# Supplementary material for: Older adults’ facial characteristics compared to young adults’ in correlation with edentulism: a cross sectional study
Source: BMC Geriatr. 2022 Jun 14;22:503. doi: 10.1186/s12877-022-03190-5 (PMC9199120; doi:10.1186/s12877-022-03190-5)
Supplement: Supplementary file 1 — Additional file 1. [file 12877_2022_3190_MOESM1_ESM.xlsx]

## Sheet: List1
Date of Birth	sex	group	BMI	g, X	g, Y	g, Z	n, X	n, Y	n, Z	enL, X	enL, Y	enL, Z	enR, X	enR, Y	enR, Z	exL, X	exL, Y	exL, Z	exR, X	exR, Y	exR, Z	psL, X	psL, Y	psL, Z	psR, X	psR, Y	psR, Z	piL, X	piL, Y	piL, Z	piR, X	piR, Y	piR, Z	prn, X	prn, Y	prn, Z	sn, X	sn, Y	sn, Z	alL, X	alL, Y	alL, Z	alR, X	alR, Y	alR, Z	ls, X	ls, Y	ls, Z	li, X
1940-02-10	M	1	25.2	-3.17	30.11	10.37	-3.779	10.986	14.001	16.635	-0.052	1.109	-22.899	0.701	-1.332	40.991	-2.472	-1.569	-47.686	0.434	-4.252	30.894	21.4	4.662	-35.144	22.025	2.129	29.194	-22.471	6.28	-36.22	-21.777	1.874	-1.883	-28.613	45.585	-2.345	-43.553	27.865	16.337	-33.363	22.571	-20.532	-31.848	20.468	-2.911	-60.459	25.033	-3.483
1945-09-14	M	1	27.1	-1.693	31.733	10.412	-1.383	8.553	13.765	15.828	-0.438	0.458	-19.252	-0.855	-0.492	39.176	-2.223	0.551	-42.649	-1.629	-0.387	27.854	12.932	7.073	-28.961	14.794	6.232	27.672	-20.015	5.964	-29.47	-16.264	6.122	-2.097	-29.49	43.064	-2.574	-44.346	24.583	18.513	-36.481	21.062	-24.265	-36.289	22.308	-4.249	-61.561	27.31	-3.933
1930-11-18	M	1	24.9	0.926	28.64	6.428	1.255	9.981	7.842	18.676	-1.682	-0.197	-19.614	0.996	0.287	43.58	-1.697	-2.986	-42.547	0.932	-4.681	32.534	18.61	1.482	-29.334	21.58	1.842	32.108	-19.251	5.321	-28.734	-15.522	6.807	-1.079	-28.344	41.197	-1.744	-40.058	23.785	18.406	-30.591	23.44	-21.598	-27.173	21.144	-2.675	-55.191	18.751	-2.731
1940-12-31	M	1	18.4	-0.234	25.406	22.188	-0.925	3.617	22.989	23.063	-1.202	1.642	-18.69	0.851	-0.924	48.711	-3.748	-2.871	-44.904	-2.301	-4.276	36.945	15.185	12.645	-30.276	17.554	15.114	35.347	-23.488	9.922	-29.73	-20.266	8.385	0.19	-37.156	46.442	-0.145	-50.649	23.314	19.39	-40.284	25.69	-19.938	-37.455	23.378	-1.543	-68.435	16.663	-1.521
1939-03-04	M	1	22.9	-0.532	24.848	10.771	-0.768	10.864	9.922	22.914	-1.544	0.2	-25.083	1.075	-0.333	45.062	-2.396	-2.567	-46.037	-0.467	-4.844	34.446	15.756	0.385	-36.213	16.824	-2.594	33.615	-19.072	0.892	-35.435	-17.06	-0.209	-1.126	-25.42	39.905	-1.643	-42.664	23.396	18.448	-32.36	20.782	-21.884	-33.801	19.663	-3.544	-61.628	23.714	-3.244
1951-05-08	M	1	28.2	-0.619	23.317	11.325	-1.637	7.9	10.838	19.726	-0.764	-0.508	-22.944	-0.799	-0.055	43.804	-1.18	-3.189	-44.189	-1.035	-3.342	31.807	14.062	5.586	-32.598	12.415	3.676	30.92	-20.182	5.064	-32.208	-20.142	4.032	-2.943	-29.549	39.447	-2.988	-42.033	20.914	18.923	-34.031	19.209	-22.594	-33.667	18.051	-1.827	-59.254	19.447	-1.822
1934-03-03	M	1	26.2	-6.063	25.343	11.565	-5.661	11.621	13.51	15.344	-0.561	2.573	-24.243	0.212	0.05	43.877	-5.607	1.119	-55.652	-3.76	-6.123	30.585	11.609	9.021	-40.545	14.449	3.384	28.18	-22.613	8.192	-38.795	-21.163	3.673	-6.585	-28.922	47.048	-6.839	-43.517	26.683	14.57	-32.623	23.647	-27.593	-32.682	21.812	-7.492	-63.156	26.795	-7.732
1939-06-22	M	1	20.5	-2.435	24.742	17.045	-2.715	9.41	15.851	16.449	-0.176	1.633	-24.208	-0.306	-1.355	41.946	-1.086	-2.643	-47.929	-0.674	-5.332	31.667	18.776	8.264	-35.05	18.548	7.737	31.381	-23.089	4.04	-34.897	-23.641	2.332	-1.333	-36.552	46.529	-2.005	-47.519	25.214	15.273	-36.059	22.536	-20.238	-34.817	21.47	-4.041	-66.931	18.712	-4.477
1952-10-26	M	1	29.1	-2.734	26.217	13.543	-2.448	13.109	15.103	14.197	-0.314	0.899	-22.301	-0.515	-1.962	41.092	-0.328	1.086	-48.105	-1.257	-6.041	29.147	14.786	9.669	-35.232	16.736	4.698	28.87	-21.478	7.196	-35.168	-21.126	2.805	-0.817	-30.203	48.309	-2.55	-46.256	30.008	17.123	-32.553	26.36	-21.119	-32.087	27.289	-3.122	-63.347	25.319	-3.276
1943-03-24	M	1	27	-0.374	23.586	16.797	-0.111	3.692	13.888	18.07	-0.536	-0.2	-18.833	-0.539	-0.158	44.824	-3.114	-1.958	-45.256	-1.788	-1.522	31.241	12.07	11.57	-33.08	11.735	9.144	32.427	-22.839	6.059	-32.759	-21.402	5.729	-0.372	-30.516	47.233	-0.864	-45.778	26.214	20.39	-37.434	25	-21.157	-36.386	23.862	-1.694	-57.603	25.34	-1.405
1949-01-01	M	1		-0.927	25.322	9.477	-2.531	6.625	10.596	17.72	-1.281	0.876	-20.483	0.716	-1.124	44.883	-0.595	-3.076	-47.051	3.758	-4.39	30.923	15.114	4.268	-32.436	19.192	3.16	32.112	-26.913	3.914	-34.348	-24.337	2.663	-1.913	-27.976	39.47	-2.18	-43.773	24.208	16.868	-33.909	20.306	-22.435	-31.773	18.429	-5.952	-59.744	30.392	-5.314
1943-10-15	M	1	25.7	-2.53	25.357	7.699	-2.806	8.446	8.752	15.744	0.461	0.905	-23.387	0.245	-0.766	39.862	-1.612	-0.664	-44.466	-1.691	-5.215	29.962	17.044	4.511	-32.372	19.601	3.31	28.324	-22.944	6.33	-32.781	-19.539	1.787	-0.576	-36.745	37.908	-1.679	-46.825	18.482	14.705	-33.999	15.04	-19.599	-33.89	15.617	-2.502	-64.65	14.994	-2.601
1949-08-06	M	1	25.3	-3.089	24.457	14.697	-3.57	6.596	16.28	11.654	2.039	1.04	-20.186	1.386	-1.521	45.405	-4.635	-3.085	-55.204	-5.444	-11.995	28.86	10.435	7.297	-34.36	13.98	5.579	27.015	-23.526	8.119	-35.742	-22.859	2.911	-2.796	-30.652	43.48	-3.25	-42.057	29.265	14.95	-32.375	24.583	-22.747	-33.267	21.712	-4.116	-61.742	22.645	-4.686
1948-07-28	M	1	27.2	-3.331	22.776	12.653	-2.346	10.746	13.379	19.265	-0.509	0.816	-23.134	0.265	-0.924	43.98	-3.568	-2.644	-48.412	-2.655	-6.694	33.881	13.881	7.638	-34.683	16.195	6.038	34.707	-16.8	4.874	-33.794	-20.865	3.244	-0.805	-34.799	50.538	-1.167	-51.108	25.523	22.214	-37.268	20.792	-24.246	-38.066	21.396	-1.951	-67.834	24.713	-1.727
1934-02-01	M	1	29.8	-3.426	27.34	9.168	-3.666	10.629	9.715	13.792	-1.614	0.57	-23.121	0.639	-0.574	42.055	-3.168	-0.507	-47.852	-0.244	-3.381	29.583	16.412	4.301	-35.289	18.916	3.553	28.699	-18.873	5.82	-34.545	-16.604	2.721	-4.295	-31.48	43.149	-5.958	-44.451	23.303	14.513	-35.222	21.429	-23.173	-31.991	20.668	-6.637	-61.413	16.855	-7.09
1950-02-04	F	1	28.4	-1.658	26.276	5.695	-2.095	12.054	6.553	14.966	-2.207	0.475	-15.781	0.078	-0.614	40.961	-4.611	-2.892	-45.48	-2.765	-6.432	27.599	11.512	3.946	-29.718	12.307	1.919	26.369	-15.677	11.151	-30	-13.939	7.238	-1.52	-15.804	37.846	-2.083	-30.121	24.29	13.347	-19.913	21.356	-17.791	-19.918	20.967	-2.464	-46.937	23.144	-2.723
1931-05-19	F	1	25.3	-0.767	22.957	7.32	-1.439	9.482	9.912	14.637	0.844	0.011	-16.475	2.572	-1.961	43.285	-7.46	-2.955	-46.153	-2.777	-5.55	28.473	8.74	3.902	-29.844	15.168	-0.192	27.559	-16.901	11.538	-31.06	-10.475	6.298	-2.189	-20.775	41.78	-1.834	-35.136	24.122	12.766	-26.006	24.972	-17.856	-25.635	23.702	-1.592	-48.963	30.687	-1.951
1941-11-05	F	1	32	-0.023	23.831	7.026	-0.352	10.76	11.287	17.45	-0.935	0.254	-20.192	-1.518	-0.402	45.735	-1.825	-3.49	-46.079	-5.719	-3.333	30.594	19.053	2.101	-33.066	15.685	2.569	30.638	-12.484	10.653	-32.08	-12.756	9.34	-0.106	-16.484	47.806	0.23	-33.565	33.308	18.015	-20.228	28.466	-18.124	-21.303	27.307	-0.253	-45.117	32.964	-0.692
1948-11-26	F	1	21.5	-0.275	24.959	8.931	-0.767	11.02	13.55	14.941	-1.047	1.102	-16.863	1.951	0.342	38.126	-3.468	-2.842	-39.02	2.356	-4.617	28.879	17.124	3.294	-27.276	18.634	1.386	27.276	-12.956	11.422	-28.071	-9.594	10.768	-0.7	-6.504	46.385	-0.647	-24.961	39.017	16.177	-14.021	33.372	-18.162	-13.799	33.525	-1.12	-37.965	43.962	-1.43
1929-10-03	F	1	23.4	-0.169	25.006	10.582	-0.687	11.805	15.364	19.103	-0.807	0.912	-21.518	1.017	-0.579	39.48	-1.341	0.095	-42.428	0.497	-1.531	29.929	19.55	4.662	-31.787	21.375	3.845	29.357	-14.209	12.369	-30.834	-12.247	10.349	-3.418	-18.898	46.168	-3.655	-31.404	30.548	15.658	-23.639	28.46	-20.96	-22.765	27.175	-4.134	-49.777	29.191	-4.199
1937-07-25	F	1	27.9	-0.31	27.329	11.382	-0.31	8.448	11.29	13.723	1.143	0.228	-16.334	0.156	-1.052	41.744	-3.264	-1.717	-41.779	-2.785	-2.414	30.961	16.977	7.536	-28.671	14.766	6.298	28.761	-15.193	8.761	-27.941	-14.305	7.858	-0.097	-25.97	40.452	-0.12	-41.397	23.846	16.505	-30.696	22.827	-16.28	-30.86	22.385	-0.652	-54.475	19.073	-0.65
1937-03-17	F	1	29.1	-0.838	25.898	5.033	-1.044	14.74	10.193	18.614	-0.065	0.779	-22.283	0.683	-0.76	42.535	-0.893	-1.634	-44.118	-0.28	-3.832	31.652	21.99	0.598	-33.972	18.987	-0.618	30.663	-14.028	8.085	-33.55	-14.643	6.71	-1.767	-13.355	41.833	-2.458	-32.432	29.074	15.262	-25.797	24.226	-18.919	-24.436	24.995	-2.74	-47.631	29.348	-3.11
1926-07-25	F	1	29.5	1.995	23.097	13.152	1.984	8.077	15.015	23.612	-0.625	-0.614	-20.564	0.435	0.397	43.991	-2.066	-0.556	-39.907	-1.117	-1.595	35.179	18.029	6.524	-29.901	17.584	7.858	35.021	-11.864	8.817	-29.558	-10.746	8.97	1.258	-19.132	48.129	1.6	-36.602	33.797	21.295	-26.056	26.136	-17.366	-25.451	27.74	1.587	-45.471	36.024	1.569
1949-09-22	F	1	30.5	1.739	20.043	4.58	1.169	9.088	9.672	18.829	-0.118	0.271	-12.832	0.047	-0.444	48.278	-6.165	-8.273	-46.332	-6.324	-7.957	35.021	12.479	-1.226	-29.417	12.515	-0.775	33.909	-14.08	8.683	-30.155	-17.534	9.038	0.132	-17.168	44.697	0.418	-32.704	30.471	20.091	-25.916	26.848	-17.179	-24.671	25.528	-0.322	-49.233	32.334	-0.858
1950-05-03	F	1	18.7	1.776	25.795	8.477	0.506	7.28	13.875	19.047	-0.694	0.895	-17.925	-0.401	-0.42	43.272	-0.077	-2.199	-41.741	-0.174	-0.729	31.382	20.579	4.399	-28.93	19.567	6.173	30.494	-15.802	8.314	-28.999	-14.592	8.546	-0.763	-21.64	44.777	-0.71	-39.701	30.046	17.18	-30.357	24.349	-16.453	-29.088	25.586	-1.193	-52.871	26.63	-1.178
1950-06-06	F	1	22.6	-0.677	25.686	8.197	-1.321	8.954	11.331	20.648	-0.105	0.568	-20.289	-0.244	-0.574	44.457	-0.492	-3.104	-44.246	-2.716	-4.402	32.676	15.509	4.323	-31.676	16.748	3.829	31.517	-20.159	7.608	-30.942	-18.725	5.655	-2.063	-21.47	43.148	-1.804	-36.606	27.226	15.892	-26.964	23.866	-17.282	-26.688	21.78	-2.258	-52.121	28.715	-2.665
1942-08-09	F	1	21.9	-2.108	27.105	5.191	-2.276	10.116	8.49	17.837	-1.145	0.934	-22.361	1.361	-1.219	41.192	-5.015	-2.435	-45.777	1.133	-5.452	31.373	15.098	-0.986	-32.953	18.236	-2.435	29.083	-16.249	9.26	-33.829	-11.815	6.051	-3.575	-15.214	43.209	-4.238	-33.084	27.68	14.587	-22.402	26.078	-21.467	-20.744	24.021	-4.694	-45.925	29.369	-5.639
1939-07-24	F	1	22.7	-0.889	28.939	6.184	-0.855	13.504	9.243	14.169	1.583	-0.931	-17.732	-0.245	0.67	44.015	-4.187	-3.188	-44.448	-5.576	-3.899	30.064	18.787	1.754	-30.778	19.009	0.82	29.991	-16.221	8.765	-29.05	-16.877	8.294	0.328	-21.197	44.129	0.164	-37.888	26.193	16.767	-30.992	24.662	-16.318	-31.809	24.789	3.326	-53.991	26.526	3.393
1942-05-02	F	1	22.3	2.504	25.099	4.347	1.471	9.67	8.483	23.688	-0.995	0.067	-16.969	0.234	-0.097	46.949	-3.79	-4.156	-41.95	-1.482	-2.774	36.21	21.136	-3.5	-28.209	22.899	-3.289	35.8	-20.041	7.15	-28.344	-17.076	7.822	-0.927	-18.471	43.757	-0.087	-35.169	28.014	15.699	-28.105	24.312	-15.159	-26.597	24.043	-0.356	-51.283	29.168	0.235
1934-09-01	F	1		0.949	26.561	11.021	0.433	5.991	14.585	18.972	0.337	0.07	-19.358	-1.034	-0.25	46.149	0.425	-6.458	-43.792	-0.357	-3.791	31.984	18.517	6.167	-31.272	16.892	5.959	32.178	-17.967	6.159	-30.983	-18.818	6.785	-0.195	-32.485	45.781	-0.084	-45.814	22.959	19.328	-34.858	22.121	-18.999	-35.6	21.51	0.855	-58.149	19.838	1
1937-11-10	F	2	33.1	-0.114	22.134	12.484	-0.392	3.584	11.853	17.965	-1.498	-0.007	-20.371	0.377	-0.726	45.373	-4.95	-3.294	-45.876	-0.951	-4.754	32.549	15.269	7.71	-31.903	18.685	7.262	31.989	-20.252	9.594	-32.293	-17.291	8.095	-0.878	-30.988	36.429	-0.711	-45.629	16.632	18.59	-36.717	16.08	-20.339	-34.906	16.169	-0.859	-59.102	16.786	-0.813
1929-10-29	F	2	25.4	-0.289	26.518	10.576	-0.645	9.115	14.627	17.51	-0.272	-0.029	-16.808	-0.238	-0.49	39.837	-1.986	-0.669	-39.156	0.097	-1.049	29.782	17.807	6.137	-28.323	17.354	7.619	29.709	-16.415	7.474	-28.012	-14.416	7.962	-1.122	-24.018	46.605	-1.565	-40.7	28.997	18.267	-32.835	24.075	-19.306	-31.95	24.19	-1.856	-57.665	30.527	-2.37
1935-07-09	F	2	27.2	0.154	24.656	9.521	0.335	18.041	10.577	19.281	-0.339	-0.223	-17.281	-0.284	-1.06	42.773	-3.525	-0.753	-45.334	-4.381	-6.006	32.109	13.974	6.209	-32.599	15.74	4.423	32.44	-25.378	-1.005	-31.638	-23.512	-2.503	-0.672	-23.061	38.04	-0.401	-38.874	18.89	16.877	-32.363	15.251	-17.503	-30.499	13.008	0.297	-52.442	22.714	-0.267
1937-06-03	F	2	28.9	0.549	24.293	5.738	0.603	7.81	14.126	18.102	-0.704	-0.336	-15.129	0.251	0.64	45.935	-7.487	-7.271	-43.474	-5.166	-3.176	32.074	17.354	0.787	-28.619	17.888	4.957	33.14	-26.864	18.223	-28.146	-20.032	17.059	-1.134	-19.179	45.921	-0.003	-35.002	32.46	19.282	-27.411	23.362	-19.146	-25.821	24.717	-0.152	-46.182	29.77	0.12
1931-04-05	F	2	41.3	-0.182	27.33	11.675	0.212	8.491	11.878	17.575	0.925	0.992	-20.738	-0.707	-1.21	43.558	-0.224	-4.314	-44.108	-0.786	-4.872	29.607	21.161	7.021	-31.055	18.222	7.378	31.463	-17.402	4.949	-30.179	-19.111	3.197	-0.484	-30.966	43.653	0.413	-44.145	22.983	18.049	-31.792	17.779	-18.483	-33.417	15.894	0.693	-56.541	25.586	0.829
1945-06-12	F	2	33.1	-3.229	27.559	6.595	-1.928	10.353	8.505	18.216	-0.712	-0.146	-18.346	0.302	-0.21	43.944	-1.184	-3.309	-45.701	-3.373	-4.413	30.477	19.496	1.492	-31.949	15.918	3.988	31.323	-18.848	8.325	-32.332	-19.373	10.438	-0.487	-23.869	44.461	-0.443	-41.051	30.774	18.169	-32.491	25.096	-19.488	-32.816	25.966	-2.003	-55.209	34.693	-1.992
1939-01-14	F	2	28.2	1.197	29.699	7.167	1.479	13.441	9.748	21.331	0.746	-0.692	-16.841	-0.667	1.429	46.81	-1.364	-2.467	-42.758	-2.953	-0.16	33.908	21.737	2.296	-30.326	21.644	4.705	33.769	-17.266	8.976	-29.756	-16.471	11.019	1.066	-20.704	44.007	1.729	-35.255	28.784	18.889	-29.166	24.756	-16.004	-29.838	23.927	1.872	-47.555	35.661	1.984
1933-02-18	F	2	29.2	2.732	27.458	0.407	2.25	12.094	7.183	22.279	0.703	0.359	-17.047	3.493	0.386	43.018	-2.062	0.007	-38.266	5.225	-3.372	32.606	16.225	-1.119	-26.238	20.514	-1.871	31.839	-21.018	7.948	-27.361	-16.413	7.616	0.846	-22.994	43.88	0.437	-39.305	24.97	19.28	-30.766	20.34	-17.096	-30.614	22.42	0.018	-54.1	30.535	-0.531
1933-12-14	F	2	28.3	-0.296	28.402	9.288	-0.053	11.393	9.091	19.64	0.093	-0.137	-19.951	0.48	-0.028	40.254	-0.919	-3.652	-41.86	1.11	-4.27	30.116	19.886	4.58	-29.611	23.096	5.433	30.695	-19.861	7.298	-28.306	-17.55	6.088	-0.654	-29.985	39.582	-0.639	-40.993	20.393	18.28	-32.567	16.197	-19.046	-31.205	17.038	-0.361	-56.758	21.144	-0.096
1949-12-17	F	2	25.4	-0.851	23.039	7.136	-0.751	10.197	9.795	17.432	1.093	-0.035	-18.987	-0.522	0.277	44.165	-2.525	-0.865	-44.617	-6.558	-3.167	30.445	12.831	3.21	-32.507	11.242	3.339	29.57	-13.34	9.405	-30.752	-17.554	10.418	-0.147	-21.902	46.942	0.065	-35.573	31.813	18.746	-27.976	27.184	-19.422	-29.437	26.18	-0.307	-51.478	37.418	0.325
1936-03-01	F	2	27.3	-0.635	27.366	8.241	-0.61	7.888	11.697	18.951	1.225	-1.155	-20.7	-0.161	0.319	47.532	-0.669	-2.947	-49.189	-6.255	-7.915	33.982	16.623	3.725	-33.965	15.553	3.477	34.278	-16.158	5.875	-33.935	-13.764	4.079	-0.215	-25.106	36.41	0.079	-39.863	18.913	19.607	-31.56	18.77	-19.086	-30.945	17.642	-0.442	-52.467	20.802	-0.011
1946-03-13	F	2	23.4	-0.689	27.111	7.339	-0.673	5.901	10.292	17.657	0.204	0.333	-17.462	-0.479	-0.277	43.069	-0.452	-1.748	-43.319	0.617	-2.915	29.453	16.576	5.908	-29.462	15.684	4.123	29.706	-17.076	7.643	-29.488	-17.304	7.141	-0.643	-22.736	39.773	-0.588	-35.234	24.466	17.99	-26.167	22.889	-17.899	-25.831	22.796	1.065	-50.157	29.402	1.133
1941-07-10	F	2	25.4	-0.883	29.259	1.595	-0.75	11.464	10.843	16.737	-0.076	0.269	-19.571	0.368	-0.504	44.521	-4.18	-3.401	-45.628	-2.153	-1.829	33.018	16.522	0.971	-32.879	15.62	0.62	32.918	-16.706	10.849	-32.498	-14.329	9.289	-0.834	-14.796	45.946	-1.041	-35.306	32.14	15.869	-25.779	28.749	-18.296	-25.263	27.952	-1.011	-49.714	38.298	-1.871
1943-09-11	F	2	28	-1.71	28.945	4.487	-1.707	11.411	10.586	17.953	-2.287	0.904	-18.723	0.328	-0.233	46.295	-7.517	-7.19	-46.076	-4.156	-8.139	34.556	12.557	1.039	-32.18	16.394	0.989	33.294	-22.941	3.007	-31.992	-18.944	2.563	-1.104	-19.885	39.18	-2.059	-35.976	25.904	14.742	-29.415	21.307	-18.225	-28.361	20.361	-2.904	-48.049	29.063	-2.935
1937-03-17	F	2	36.7	-3.816	30.548	5.05	-2.861	6.793	11.019	14.808	-0.305	-0.141	-22.795	0.488	-0.089	44.849	-3.255	-0.808	-51.797	-3.798	-7.178	31.893	16.776	3.961	-37.006	15.897	1.731	30.953	-20.381	8.161	-35.156	-17.988	4.365	-1.382	-25.25	41.955	-1.707	-41.876	21.728	15.282	-32.166	19.801	-19.087	-33.973	20.012	-1.769	-57.083	21.136	-1.796
1932-06-27	F	2	25.4	0.175	28.075	8.637	-0.051	8.771	10.69	20.143	-1.073	0.69	-19.307	-0.447	-0.448	41.412	0.145	-0.91	-42.32	-0.935	-1.991	30.227	21.328	4.693	-30.553	21.792	3.827	32.009	-22.762	3.35	-31.302	-22.763	3.825	-0.534	-25.319	36.462	-0.505	-39.947	20.092	17.387	-32.982	17.777	-17.368	-31.655	17.051	-0.189	-57.222	25.296	-0.825
1926-06-14	F	2	23.4	-0.21	23.668	14.57	-0.641	3.048	14.113	17.187	1.09	0.219	-18.046	-1.469	-0.191	41.523	0.726	-3.064	-41.562	-1.521	-2.414	29.676	20.47	8.049	-27.936	16.832	9.132	30.975	-17.378	-0.836	-27.659	-20.564	-0.998	-0.853	-34.38	32.363	-0.392	-46.658	15.342	17.291	-33.572	14.034	-16.868	-35.309	14.7	-0.578	-57.663	16.295	-1.585
1951-01-10	M	2	25.1	0.001	29.236	12.137	-0.402	4.857	14.175	21.387	-0.955	0.31	-19.768	-0.007	-0.656	47.507	-2.043	-2.204	-47.299	-1.912	-3.564	36.18	14.777	7.066	-34.559	13.751	5.73	35.533	-22.237	5.994	-33.417	-19.279	5.548	-2.102	-31.602	45.776	-2.359	-48.984	24.292	18.862	-35.48	21.556	-21.881	-34.045	21.293	-1.52	-62.841	25.765	-1.596
1939-10-03	M	2	30.4	-1.349	28.127	8.548	-1.033	13.114	10.993	20.072	0.15	0.506	-19.548	-1.04	-0.605	44.799	-0.743	-0.314	-47.553	-2.612	-1.171	32.733	17.657	5.517	-32.791	17.188	6.64	32.536	-20.797	8.641	-32.82	-18.392	6.127	-1.256	-28.453	51.286	-1.238	-46.005	31.808	18.855	-37.642	29.02	-20.127	-38.619	27.35	-1.373	-65.024	35.009	-2.288
1945-04-12	M	2	36.4	-0.31	28.512	8.943	-0.311	8.939	12.03	21.653	-1.323	2.169	-21.275	-0.1	0.386	48.085	-4.338	-4.308	-50.025	-3.751	-7.106	34.679	17.653	3.395	-35.35	17.05	2.544	34.74	-22.499	7.827	-34.372	-19.641	6.821	0.207	-28.719	43.894	0.058	-44.974	25.679	21.572	-38.188	20.801	-22.038	-36.417	19.108	-0.47	-65.516	23.227	-0.994
1937-03-19	M	2		1.603	27.764	12.119	1.159	7.678	13.284	19.528	0.215	0.092	-15.928	-0.389	-0.163	43.946	-0.955	-5.647	-43.377	-3.86	-4.436	33.882	19.361	4.145	-29.033	17.904	9.095	33.563	-18.738	9.106	-29.409	-16.865	7.975	0.917	-24.493	47.295	0.787	-44.282	25.951	21.583	-34.494	21.136	-17.559	-34.507	21.57	2.547	-60.744	19.78	1.378
1944-09-04	M	2	30.8	-1.078	24.528	14.39	-0.823	6.276	15.32	19.815	0.573	0.007	-16.162	-1.182	-0.185	48.168	-3.157	-6.274	-45.093	-3.594	-4.058	34.93	12.027	6.667	-32.544	10.818	7.144	36.023	-23.988	3.87	-30.175	-22.491	2.538	-0.675	-34.7	42.253	-0.29	-44.277	22.222	14.489	-36.844	15.062	-15.572	-35.887	15.662	-0.378	-63.517	21.869	-0.407
22.11.192	M	2	26.4	-1.503	27.522	10.895	-1.111	10.194	11.258	13.987	-0.461	0.676	-18.709	-0.96	-0.809	42.806	-3.81	-2.996	-44.061	-2.113	-1.426	28.886	12.12	9.168	-31.293	10.756	8.093	29.475	-21.034	4.493	-30.72	-20.398	2.643	-0.582	-28.866	41.415	-1.048	-41.191	24.776	17.848	-31.505	18.417	-18.494	-31.107	19.01	-1.114	-55.371	18.231	-0.663
1943-12-16	M	2	30.5	-0.587	26.654	18.289	0.178	9.241	17.319	19.764	-0.422	-2.006	-21.428	-0.661	1.403	43.226	-3.251	-2.601	-46.425	-2.14	-4.913	32.483	15.25	8.318	-33.464	15.464	6.213	33.258	-20.195	3.588	-32.627	-17.63	4.525	0.034	-30.362	50.145	-0.244	-45.377	31.227	16.091	-36.366	20.322	-16.205	-36.933	20.891	-2.31	-63.888	28.654	-1.558
1931-09-09	M	2		-2.845	28.537	12.438	-2.836	10.709	13.787	15.318	-0.872	0.712	-19.76	0.373	-1.798	35.825	-1.724	1.478	-43.551	-2.446	-3.857	25.312	12.992	9.188	-30.525	12.205	6.411	26.161	-18.213	7.993	-30.037	-16.549	5.746	-2.634	-34.847	43.762	-2.403	-45.342	25.44	18.128	-35.788	21.603	-21.73	-34.822	20.852	-5.283	-60.12	29.797	-3.587
1939-03-22	M	2	22.2	1.687	30.814	11.209	0.959	7.741	11.181	19.443	-0.142	0.831	-19.38	-0.169	-0.886	43.439	-3.202	-0.155	-44.571	-2.133	-3.313	34.862	18.048	6.403	-29.95	19.766	5.708	32.054	-22.169	5.528	-31.345	-20.832	2.929	-1.178	-28.252	42.181	-0.569	-44.306	23.988	17.191	-34.85	20.562	-17.312	-35.68	18.394	-1.018	-62.757	32.413	-0.755
1933-01-24	M	2	26.2	0.998	31.807	11.754	1.47	9.08	13.657	23.941	-0.257	-0.448	-18.782	-0.083	0.394	52.732	-3.393	-6.735	-47.341	-7.637	-4.583	37.904	17.561	4.696	-34.064	15.039	3.939	37.115	-21.861	2.43	-32.212	-24.737	3.189	1.844	-32.578	45.221	2.324	-50.959	26.599	25.735	-40.692	22.77	-21.163	-38.333	21.372	2.939	-70.553	24.168	1.736
1937-04-04	M	2	26.2	-3.121	26.738	13.913	-2.007	8.989	16.731	19.687	-0.179	0.665	-22.701	0.11	0.244	47.019	-3.044	-5.633	-49.031	-2.15	-6.84	35.231	16.589	5.509	-35.775	18.119	5.956	34.036	-19.823	3.814	-34.931	-17.97	3.254	-2.107	-27.194	41.712	-2.707	-44.123	23.912	14.674	-32.932	21.275	-20.369	-32.5	19.412	-2.451	-63.615	20.909	-2.949
1944-04-01	M	2	34.3	-1.489	33.413	15.474	-1.489	6.445	15.628	18.149	0.055	-0.001	-17.751	0.86	-0.181	45.035	-0.118	-3.6	-46.323	1.756	-4.778	32.218	20.807	10.821	-32.697	22.024	12.092	32.544	-20.746	2.161	-32.544	-19.409	3.715	-1.438	-28.831	38.911	-1.086	-43.994	20.273	21.456	-32.884	20.126	-22.395	-33.91	19.559	0.021	-61.712	21.125	-0.805
1950-12-31	M	2	32.5	0.226	29.222	9.978	-0.345	10.259	8.974	20.905	0.253	0.442	-17.864	-0.156	0.02	43.155	-1.828	-1.197	-40.371	-0.46	-1.934	34.556	14.632	4.923	-28.728	18.166	6.154	32.959	-22.554	5.329	-29.081	-19.653	4.601	-1.341	-23.938	42.785	-0.943	-38.929	27.32	19.535	-30.441	21.351	-20.76	-29.671	19.124	-1.656	-52.468	35.11	-1.918
1948-08-15	F	3	25	1.457	25.208	6.762	1.45	15.416	9.609	21.426	-0.428	-0.201	-15.546	0.02	0.112	43.867	-2.81	-0.654	-40.391	-2.608	-0.293	32.564	19.901	0.42	-27.867	17.801	4.091	32.632	-21.613	7.64	-27.859	-20.39	7.148	0.813	-24.841	46.487	0.957	-40.178	28.335	18.155	-32.004	24.004	-15.85	-32.507	23.566	0.738	-57.454	31.986	0.512
1952-04-02	F	3	25	0.595	26.359	7.854	0.336	11.078	11.708	18.166	1.259	-0.064	-18.295	-1.164	0.34	49.863	-4.263	-10.63	-45.588	-3.835	-4.009	34.19	14.008	2.976	-31.361	13.666	3.778	34.406	-15.379	3.651	-31.009	-16.219	5.064	0.605	-23.083	44.717	0.232	-37.153	28.718	17.983	-31.485	24.075	-16.343	-30.312	24.659	0.109	-54.206	34.566	-0.139
1936-12-06	F	3	34.7	-0.035	28.762	-3.689	-0.016	15.547	2.925	21.019	-0.122	-0.727	-20.815	-1.035	0.447	43.983	-1.636	-1.369	-41.931	-1.97	-0.69	31.864	20.986	-6.531	-32.481	20.585	-5.585	33.476	-17.914	11.553	-31.127	-17.222	12.587	0.789	-17.157	48.353	1.023	-32.158	35.863	20.39	-26.25	27.45	-16.641	-25.319	29.177	1.283	-48.626	44.116	1.033
1921-05-30	F	3	24	-0.3	31.74	3.556	-0.275	8.883	9.673	20.294	0.843	0.037	-19.163	0.338	0.069	41.231	-1.664	-2.39	-39.652	-1.618	-1.847	31.406	22.829	-0.884	-29.152	22.816	1.154	32	-17.571	6.118	-28.575	-14.372	6.642	-0.388	-23.232	38.762	-0.058	-37.161	25.441	15.558	-27.602	20.091	-17.695	-28.904	19.849	-0.422	-51.876	26.706	0.171
1946-07-29	F	3	27.5	0.201	27.26	6.642	-0.054	9.692	11.247	20.442	0.739	-0.045	-17.527	-1.022	0.094	45.027	-1.11	-4.083	-43.465	-3.069	-2.387	33.403	20.19	4.115	-29.453	19.282	5.408	33.16	-18.399	7.721	-29.972	-18.225	9.091	0.58	-21.071	43.966	0.376	-37.935	30.274	19.33	-29.598	23.382	-18.177	-28.321	24.299	0.432	-46.842	36.742	0.196
1948-06-11	F	3	23.9	-2.024	24.324	5.539	-1.969	8.122	11.033	18.67	0.112	0.126	-21.686	-1.191	-0.237	44.823	-2.961	-2.876	-46.727	-4.48	-4.399	32.433	15.408	2.081	-35.14	14.315	0.712	32.969	-23.243	10.609	-33.833	-22.795	8.755	-1.006	-19.204	48.015	-0.657	-33.406	36.864	16.911	-29.162	27.764	-17.705	-29.12	28.583	-0.429	-52.397	45.147	-0.131
1941-05-20	F	3	22.6	-0.542	30.611	5.924	-0.506	9.845	10.835	19.233	1.61	0.695	-18.744	0.362	0.411	47.812	2.8	-4.511	-47.775	-1.681	-6.478	32.535	18.202	4.23	-33.23	17.24	3.889	32.296	-15.394	10.426	-32.663	-16.677	9.24	0.243	-21.679	42.496	0.755	-37.681	24.651	19.592	-26.785	21.681	-17.875	-27.197	21.776	0.442	-51.443	25.926	0.334
1920-04-17	F	3	22.4	-0.412	31.428	2.863	-0.465	11.615	9.596	16.846	-0.443	0.454	-16.298	0.586	-0.956	39.265	-2.224	-1.649	-38.808	0.201	-1.987	29.601	17.592	1.717	-27.548	17.925	1.438	30.276	-15.16	10.715	-26.881	-13.894	9.375	0.115	-17.904	43.575	0.548	-35.774	32.863	17.591	-28.003	27.119	-17.258	-26.647	26.39	1.015	-53.902	39.114	1.443
1933-05-17	F	3	23.5	1.27	28.701	4.853	0.929	10.603	9.418	20.08	0.565	-2.284	-18.724	1.204	1.427	46.532	-6.068	-8.048	-42.91	-2.359	-5.217	33.437	19.882	-1.175	-29.479	21.768	-0.26	32.808	-18.955	3.868	-27.544	-14.402	5.181	0.245	-14.758	40.288	0.413	-30.213	28.985	17.267	-25.036	23.182	-17.605	-25.107	21.909	-0.693	-44.757	33.537	-0.691
1939-03-03	F	3	25	1.225	28.039	-4.44	1.502	13.465	5.556	21.957	-0.549	-0.38	-18.519	0.205	-0.693	47.61	-6.398	-4.667	-45.093	-2.746	-2.264	35.225	21.228	-7.795	-31.307	20.344	-5.235	36.567	-18.03	13.422	-29.387	-15.051	14.045	3.035	-6.002	44.955	2.596	-28.116	38.316	19.204	-22.704	29.831	-14.749	-23.029	31.768	3.438	-45.292	49.516	4.022
1950-09-16	F	3	27.7	0.602	29.863	6.417	0.769	9.034	13.645	23.958	-0.937	-0.514	-20.345	0.84	0.65	52.799	-4.088	-10.662	-48.179	-3.501	-3.453	36.648	18.452	-1.56	-33.156	18.973	2.355	37.278	-18.366	9.471	-33.349	-17.853	11.387	0.018	-16.799	50.202	1.129	-32.718	35.765	19.353	-29.54	29.234	-17.305	-28.995	29.48	2.246	-51.177	40.28	2.887
1952-08-12	F	3	28.7	0.268	28.8	2.796	0.028	10.223	9.762	16.23	0.209	-0.715	-15.737	0.093	0.539	43.104	-5.706	-5.848	-41.755	-3.606	-5.43	31.064	19.731	0.356	-27.46	19.612	1.271	32.121	-19.888	7.171	-26.998	-18.322	8.779	0.13	-22.069	47.628	-0.046	-37.128	32.528	15.479	-29.588	25.92	-16.261	-29.002	27.258	-0.302	-50.687	34.843	0.015
1925-12-21	F	3	23.9	-1.34	28.228	6.796	-1.401	10.017	12.624	16.014	1.897	-1.035	-15.388	0.633	0.43	40.621	-1.882	-2.581	-43.631	-3.679	-5.432	29.25	19.375	4.035	-29.864	18.412	5.015	29.7	-16.546	9.501	-29.674	-18.475	9.262	-1.029	-26.023	49.85	-0.941	-40.501	33.587	17.353	-31.064	29.387	-19.711	-31.443	28.522	-1.361	-60.217	33.784	-1.075
1951-02-24	F	3	28	2.299	24.695	8.009	1.672	14.871	9.467	20.427	0.003	0.368	-15.704	0.261	-0.116	45.952	-2.657	0.6	-43.433	-0.231	-2.29	33.481	14.933	2.835	-27.783	17.8	0.732	32.375	-20.562	13.326	-27.388	-15.793	12.462	0.795	-17.024	45.483	-0.115	-32.855	28.949	19.053	-26.277	26.396	-18.069	-23.798	22.842	-1.104	-48.803	35.175	-0.692
1939-04-07	F	3	24.8	1.249	26.766	10.196	1.508	7.242	12.439	21.143	0.188	-0.028	-17.393	-1.329	-0.041	42.65	0.695	-2.724	-40.597	0.652	-2.157	32.703	17.71	3.404	-27.205	17.249	4.851	32.594	-17.776	5.805	-28.708	-19.913	7.503	0.43	-23.813	42.536	1.433	-39.395	28.087	18.893	-30.647	21.353	-15.932	-30.35	21.644	0.755	-54.943	30.293	1.423
1934-06-28	F	3	20.3	-0.968	23.974	5.55	-1.068	15.118	6.748	12.811	0.005	-0.428	-17.284	-0.232	-0.724	40.389	-2.542	-4.642	-44.404	-1.945	-5.508	27.045	13.32	2.133	-30.276	13.459	0.906	27.399	-16.741	4.824	-30.113	-15.385	3.666	-0.517	-20.469	38.934	-0.799	-33.033	24.499	16.226	-26.514	17.949	-18.466	-24.943	18.609	-2.338	-48.641	29.466	-2.335
1952-07-16	F	3	24	-15.801	28.67	7.012	-0.696	8.35	15.296	18.79	0.444	0.188	-16.106	-0.167	0.234	47.298	-5.083	-3.139	-43.49	-0.7	-0.676	34.951	13.419	3.695	-28.488	12.485	6.803	34.633	-19.967	8.65	-29.904	-18.68	9.405	0.038	-23.815	44.454	0.576	-36.921	28.87	17.343	-28.258	22.872	-16.668	-29.18	21.36	0.305	-50.444	30.604	0.306
1952-11-14	M	3	31.8	2.15	25.481	10.623	1.847	7.655	12.123	22.685	-0.595	-0.084	-21.062	-0.632	0.354	49.795	-5.436	-5.101	-48.096	-4.273	-4.113	37.578	14.547	1.344	-32.837	15.013	2.602	36.97	-25.737	1.309	-32.225	-22.738	2.657	0.916	-28.959	42.728	0.686	-46.259	25.012	20.641	-37.323	19.641	-18.284	-35.664	19.7	0.658	-64.714	29.012	0.368
1944-07-15	M	3	28.7	-1.699	31.758	12.365	-0.155	10.793	11.895	20.098	0.074	-0.175	-20.425	-0.86	-0.445	48.046	0.07	-3.121	-46.574	-1.186	-3.474	33.02	20.075	5.592	-31.717	18.742	6.428	34.651	-20.909	4.63	-31.572	-21.205	3.69	1.341	-29.481	44.18	1.039	-40.74	30.69	23.029	-36.003	26.292	-19.75	-34.027	25.603	1.335	-62.383	32.528	1.634
1923-10-16	M	3	22	2.416	30.277	5.697	2.131	13.267	10.959	22.931	0.438	-1.322	-18.326	0.528	1.123	42.921	-2.684	-2.531	-39.947	0.825	-0.658	33.571	18.987	1.795	-26.968	21.018	4.156	34.839	-24.504	8.052	-26.806	-19.171	8.02	1.509	-27.821	48.344	1.729	-41.293	33.871	19.949	-33.507	24.283	-16.49	-33.312	25.209	1.578	-57.529	40.229	1.58
1947-06-16	M	3	28.4	0.843	34.17	14.747	1.267	9.529	17.761	24.544	-2.318	-0.051	-19.147	0.19	0.439	47.569	-3.165	1.015	-46.731	-1.925	-3.348	34.643	16.208	13.408	-31.981	18.998	11.701	35.374	-21.719	6.837	-33.244	-18.95	8.467	0.619	-35.566	51.394	0.369	-55.446	30.575	21.662	-42.976	25.382	-20.677	-42.701	26.988	0.596	-75.335	33.097	0.618
1953-01-13	M	3	22	-1.78	26.062	10.618	-1.145	8.708	14.119	21.353	-0.24	0.999	-21.855	1.305	-0.672	45.151	-0.928	-3.91	-46.247	1.454	-2.967	33.653	11.019	6.134	-32.993	12.994	6.88	34.791	-22.864	2.935	-33.588	-20.327	4.129	-0.358	-24.83	42.035	-2.272	-41.526	23.614	13.821	-32.8	19.394	-17.792	-32.382	21.609	-2.66	-58.799	26.259	-2.976
1952-07-14	M	3	27.5	-1.041	32.616	11.868	-1.319	12.183	14.564	19.562	1.254	0.6	-20.295	-1.82	-0.861	47.738	-1.133	-0.56	-46.863	-1.981	1.025	33.486	17.381	5.376	-31.995	16.193	6.47	34.799	-15.836	6.892	-32.289	-17.276	7.471	0.287	-24.137	52.838	1.719	-43.054	30.061	22.95	-31.18	25.637	-24.274	-32.824	27.714	1.312	-57.91	36.384	1.97
1949-10-14	M	3	24.8	0.536	25.61	17.472	-0.298	6.916	19.006	20.31	-0.19	1.418	-18.592	1.023	-0.627	44.844	-1.58	-2.816	-44.504	0.937	-3.652	33.095	13.766	9.179	-30.104	15.24	10.544	33.968	-17.627	4.154	-31.1	-16.808	3.807	-0.374	-31.667	46.623	-1.029	-45.233	29.842	18.734	-36.558	21.152	-20.3	-35.277	20.843	-0.96	-65.408	30.747	-1.162
1952-11-28	M	3	29.5	1.707	29.059	18.082	1.705	9.422	20.206	22.076	-0.473	0.535	-18.339	-0.378	-0.639	49.777	-1.101	-4.503	-44.728	0.23	-3.172	36.151	19.299	10.746	-29.978	17.207	10.213	36.164	-22.287	5.548	-29.846	-21.73	6.969	0.857	-33.94	60.742	1.108	-48.742	39.448	18.05	-38.882	32.459	-13.678	-37.539	30.443	1.196	-70.388	38.712	1.238
1951-10-29	M	3	28	0.824	30.157	12.993	1.149	12.878	13.763	20.073	0.436	-0.155	-17.338	-0.786	0.197	46.356	0.468	-4.183	-44.431	1.333	-2.712	34.101	16.706	5.029	-28.979	15.849	6.478	34.178	-22.876	3.544	-29.122	-22.14	4.632	0.238	-30.838	49.646	1.137	-46.104	28.909	20.638	-34.82	23.786	-19.74	-34.988	22.159	1.534	-63.413	33.151	1.638
1938-12-28	M	3	36.6	0.577	29.468	6.104	1.113	17.237	8.477	21.202	0.366	-1.141	-17.641	-2.311	0.392	46.461	-1.367	-5.189	-46.776	-1.128	-6.818	35.523	15.367	3.162	-31.203	15.542	4.057	36.23	-19.192	1.285	-30.915	-17.934	4.216	0.852	-27.463	40.413	0.756	-39.844	21.038	22.58	-30.758	21.197	-22.304	-32.147	19.395	-0.1	-54.435	26.603	-0.17
1926-02-28	M	3	23.1	0.003	28.39	9.006	0.537	7.338	12.498	21.685	0.417	-0.271	-17.085	0.496	0.337	49.592	0.862	-1.821	-41.875	2.643	0.177	35.368	17.755	7.932	-29.172	16.327	9.536	35.521	-22.679	5.816	-29.465	-21.643	6.169	0.089	-31.417	46.036	0.523	-46.287	26.414	16.309	-34.876	27.545	-17.119	-35.558	21.018	0.622	-65.545	29.749	-0.376
1949-10-03	M	3	26.9	1.874	29.143	6.501	0.615	15.251	12.465	24.078	-1.461	2.377	-23.593	-0.256	0.438	48.812	-7.218	-4.454	-46.667	-2.243	-4.25	36.965	13.932	3.35	-37.498	17.27	1.394	35.618	-26.115	5.96	-33.761	-22.357	5.292	0.106	-20.26	52.151	-0.68	-42.918	34.644	19.68	-33.571	28.074	-20.777	-33.054	27.437	-1.437	-61.607	40.612	-2.258
1944-10-03	M	3	26.6	-2.295	25.807	9.796	-2.279	8.081	12.006	20.525	-1.78	0.987	-21.961	-0.4	-1.582	44.345	-3.741	-1.31	-47.396	-2.311	-0.181	33.434	16.127	3.816	-33.125	16.077	5.564	33.421	-22.684	6.727	-34.216	-19.825	5.477	-2.052	-26.247	45.182	-2.352	-44.599	30.264	17.332	-36.038	24.866	-22.071	-32.816	24.482	-4.754	-61.207	36.645	-4.229
1994-07-20	M	4	22	-0.904	30.869	9.882	-1.242	11.236	16.225	16.612	-0.993	1.028	-19.507	0.843	-0.545	47.031	-4.206	-7.198	-47.473	-1.971	-9.135	33.932	15.741	5.907	-32.361	17.636	3.247	33.01	-18.541	8.226	-33.532	-13.825	7.566	-1.83	-13.502	48.616	-1.78	-31.866	38.335	17.118	-24.585	32.41	-19.399	-23.552	30.719	-2.535	-44.076	44.122	-2.455
1986-09-04	M	4	21.3	-1.389	27.367	10.875	-1.543	12.25	14.682	13.928	-0.842	-0.102	-16.613	0.53	0.05	43.552	-3.498	-4.676	-44.012	0.018	-4.517	33.276	15.756	4.132	-30.652	17.652	4.219	31.708	-20.335	7.63	-30.021	-14.323	8.831	-1.726	-20.628	49.174	-2.034	-38.078	39.04	14.934	-28.933	30.929	-18.333	-27.226	30.811	-2.45	-48.963	40.921	-2.892
1988-05-11	M	4	23.9	-0.469	27.904	11.96	-0.566	10.879	14.881	18.362	-0.396	-0.619	-15.134	0.168	0.792	49.349	-6.443	-10.781	-45.232	-12.263	-8.978	34.141	17.418	2.499	-31.607	11.749	3.989	35.64	-16.994	6.467	-30.326	-19.352	6.964	-0.719	-20.06	54.646	1.044	-35.966	40.54	20.599	-28.312	33.257	-17.821	-27.978	33.297	0.364	-47.125	45.078	-5.248
1985-05-15	M	4	23	-1.061	28.134	12.594	-0.929	15.204	16.645	14.584	0.409	-0.275	-15.476	-0.486	0.293	40.014	1.029	-3.861	-41.668	0.172	-4.655	29.594	22.136	9.288	-28.74	20.02	9.873	28.488	-12.219	10.862	-30.801	-13.887	11.654	-0.212	-9.497	56.05	-1.237	-29.006	44.478	14.865	-21.041	36.585	-16.529	-22.331	37.929	-1.752	-42.558	47.617	-1.507
1987-09-19	M	4	31.1	-3.205	32.705	10.002	-1.826	11.326	14.98	12.961	-1.486	0.652	-21.343	0.742	-0.653	42.262	-6.137	-2.571	-46.002	-0.981	-4.192	-35.152	18.437	4.064	28.937	14.604	7.407	26.348	-17.7	6.98	-35.826	-14.486	5.901	-3.546	-21.619	49.088	-6.113	-41.223	35.301	14.416	-32.772	29.485	-23.791	-29.349	28.933	-6.18	-52.324	38.724	-7.372
1987-08-02	M	4	30.9	1.041	32.397	7.001	0.479	11.467	12.236	19.486	-0.69	-0.347	-17.896	-0.314	0.254	47.576	-4.345	-7.555	-45.978	-2.08	-4.966	35.561	17.248	3.409	-33.365	19.052	3.859	34.722	-20.986	5.067	-32.643	-19.179	5.981	-0.848	-18.49	43.696	-1.841	-35.647	33.058	17.121	-28.96	24.644	-18.148	-28.463	25.049	-1.672	-50.167	36.496	-1.785
1988-06-16	M	4	29.1	-1.845	24.436	8.541	-2.144	10.472	13.134	13.801	-0.518	-0.412	-19.233	0.466	-0.893	43.47	-4.049	-4.976	-45.942	-1.897	-5.197	29.709	12.531	6.563	-31.423	12.008	5.258	29.487	-17.961	9.988	-31.681	-17.912	12.351	-2.133	-11.866	46.827	-1.538	-26.033	40.673	15.637	-23.262	31.032	-18.142	-22.905	31.002	-2.358	-41.713	46.732	-2.181
1989-05-12	M	4	19.7	0.998	29.64	12.892	0.03	11.36	15.29	15.972	0.326	-0.26	-16.177	0.938	1.097	44.375	0.108	-6.135	-43.089	1.257	-5.795	33.104	19.458	4.599	-31.154	22.2	5.082	33.792	-20.13	6.051	-31.145	-18.192	6.731	0.221	-23.085	48.79	-0.236	-39.084	34.235	16.191	-30.885	27.839	-17.482	-30.394	28.196	-0.823	-50.755	39.737	0.287
1985-02-03	M	4	24.8	-1.686	28.027	13.091	-1.757	8.941	16.025	16.964	-0.259	0.684	-19.342	-0.191	-0.342	42.456	0.621	-2.251	-43.47	-0.374	-3.499	29.938	15.505	7.587	-31.424	15.009	7.737	29.581	-18.451	12.278	-31.395	-16.671	10.234	-3.13	-16.704	52.087	-2.36	-36.647	41.305	15.654	-26.997	33.903	-18.799	-28.049	32.893	-2.088	-48.382	46.995	-2.089
1986-12-06	M	4	26.3	-1.209	30.481	8.835	-0.795	13.241	12.98	16.217	-0.83	0.246	-18.068	0.208	0.37	46.366	-0.556	-5.141	-48.375	0.525	-4.436	32.551	20.352	3.463	-33.139	19.857	4.063	32.811	-19.84	10.54	-33.521	-16.775	10.618	-1.276	-20.349	56.244	-1.551	-37.17	42.362	18.459	-31.45	35.127	-21.796	-29.855	35.441	-1.997	-52.399	48.508	-1.779
1988-06-21	M	4	19.8	0.869	26.397	13.86	1.845	9.243	13.414	19.359	-0.053	-1.518	-16.254	0.287	1.094	46.714	0.34	-7.923	-43.328	-0.256	-3.715	34.403	13.989	6.419	-28.889	15.237	8.586	35.189	-22.373	1.93	-27.631	-22.084	6.027	1.76	-28.745	41.468	1.524	-43.923	25.908	20.102	-33.367	23.582	-17.043	-34.361	20.988	2.114	-56.144	28.485	2.265
1990-01-26	M	4	22	-1.398	33.134	10.817	-1.298	11.59	14.992	17.524	0.405	0.34	-16.566	-1.023	0.366	45.144	1.983	-7.156	-44.399	0.694	-6.798	32.66	21.282	3.703	-30.625	20.077	5.636	32.058	-18.426	7.02	-30.147	-17.283	7.292	-0.273	-18.675	47.313	-0.927	-37.599	36.116	17.326	-27.894	25.86	-17.378	-27.553	28.35	-0.971	-48.864	38.128	-0.39
1991-01-24	M	4	23	-0.944	27.034	14.1	-0.657	9.305	13.052	18.814	1.719	-0.238	-17.619	0.056	0.475	47.355	-3.151	-6.365	-46.68	-5.556	-6.532	35.719	18.144	4.498	-33.568	16.03	5.117	33.913	-17.077	4.282	-30.728	-19.021	6.99	-0.208	-24.077	42.808	-0.03	-38.588	31.236	17.732	-31.394	24.143	-17.322	-31.722	25.77	-0.396	-54.68	36.461	0.416
1990-06-17	M	4	21.2	-0.781	26.316	14.534	-0.57	6.579	16.84	18.286	0.533	0.394	-18.428	-0.665	-0.523	48.194	0.212	-8.48	-48.475	-3.439	-7.962	35.377	20.509	6.276	-35.465	18.431	6.23	34.002	-16.942	5.011	-32.43	-19.235	4.873	-0.233	-24.102	45.703	1.032	-38.693	32.227	18.342	-29.58	27.453	-16.202	-30.689	27.717	1.828	-48.578	34.989	2.897
1988-06-27	M	4	24.8	2.573	30.12	4.496	2.285	9.697	11.309	20.457	-0.045	-0.347	-14.165	-0.096	0.533	49.032	-2.386	-7.905	-42.986	-3.127	-5.172	34.366	14.672	1.255	-27.866	14.818	3.331	35.71	-19.059	8.066	-27.509	-17.212	9.423	2.392	-15.906	54.722	1.221	-31.765	43.729	19.961	-27.489	32.771	-16.864	-26.667	30.93	1.909	-45.602	46.585	2.243
1989-01-25	F	4	21	-0.834	23.94	6.559	-0.955	7.936	10.744	16.743	-1.372	0.423	-17.9	0.761	0.366	42.23	-1.987	-3.888	-43.843	-1.436	-4.176	31.681	16.419	-0.263	-31.625	17.478	1.383	32.359	-17.492	8.271	-31.702	-14.919	8.061	-0.045	-16.732	47.342	-0.74	-35.223	37.26	16.275	-24.958	31.134	-18.946	-27.139	31.165	-0.466	-42.826	42.928	-0.272
1988-02-22	F	4	18.9	0.054	25.918	8.169	-0.214	11.425	12.469	17.27	-0.094	0.688	-19.327	0.401	-0.027	44.252	0.358	-4.578	-46.605	-0.241	-6.327	33.401	17.33	3.552	-32.291	15.863	2.753	32.819	-15.728	12.694	-32.867	-14.627	12.238	-1.081	-9.714	48.474	-0.956	-29.223	38.291	15.398	-20.946	33.311	-17.781	-20.779	34.8	-1.529	-38.772	43.779	-1.886
1985-09-12	F	4	20.4	-1.389	27.367	10.875	-1.543	12.25	14.682	13.928	-0.842	-0.102	-16.613	0.53	0.05	43.552	-3.498	-4.676	-44.012	0.018	-4.517	33.276	15.756	4.132	-30.652	17.652	4.219	31.708	-20.335	7.63	-30.021	-14.323	8.831	-1.726	-20.628	49.174	-2.034	-38.078	39.04	14.934	-28.933	30.929	-18.333	-27.226	30.811	-2.45	-48.963	40.921	-2.892
1989-03-29	F	4	23.1	0.559	24.447	7.557	0.057	11.244	11.194	16.652	-0.919	0.801	-16.047	-1.482	-0.521	42.676	-1.704	-4.833	-42.199	-2.445	-5.199	31.914	20.044	1.314	-28.26	16.966	1.431	32.24	-18.105	8.429	-27.896	-16.689	7.852	-0.149	-17.839	45.804	0.415	-35.629	33.592	15.939	-26.865	28.954	-15.433	-27.15	27.529	-0.257	-46.499	38.164	0.434
1991-02-07	F	4	22.6	-1.778	27.302	2.96	-1.816	11.879	9.071	20.468	1.099	-0.483	-21.227	-0.71	0.393	50.656	-4.308	-8.484	-51.01	-7.922	-10.259	37.876	18.841	-3.827	-36.251	17.081	-3.536	38.988	-20.108	19.148	-34.635	-20.483	20.448	0.396	-9.74	46.023	0.515	-27.194	37.794	16.276	-20.511	29.44	-16.479	-21.87	29.25	0.967	-40.525	46.212	1.013
1987-05-17	F	4	19.1	2.145	29.049	7.499	1.931	12.172	13.184	19.745	0.792	-0.472	-15.215	-1.284	0.998	45.859	-0.213	-6.746	-42.913	-0.379	-3.994	32.579	20.802	3.58	-28.619	18.982	5.004	34.018	-14.635	9.646	-28.625	-15.373	11.671	0.939	-11.984	42.819	1.457	-29.279	32.407	16.255	-23.5	28.063	-12.816	-23.373	28.556	2.917	-41.149	35.406	2.683
1990-09-24	F	4	19.5	-0.143	24.551	4.418	-0.342	8.706	10.336	15.551	-0.399	0.772	-15.774	0.684	0.235	45.571	1.021	-5.834	-44.967	0.337	-6.293	32.666	18.294	2.52	-30.234	19.49	2.394	33.628	-17.318	10.905	-28.999	-13.833	9.896	-0.729	-11.813	42.862	-0.433	-28.651	35.365	14.24	-22.715	26.558	-15.342	-22.07	27.829	-0.337	-43.211	42.16	-0.129
1985-11-16	F	4	20.2	1.309	21.505	8.83	1.673	8.212	10.36	18.757	0.397	0.05	-13.916	-0.029	0.465	43.483	2.962	-3.945	-39.615	0.663	-4.917	31.208	19.655	2.162	-26.925	16.393	4.241	31.89	-14.633	5.999	-25.966	-14.679	5.58	0.873	-16.362	43.663	2.353	-36.726	32.643	19.316	-25.288	26.077	-16.287	-27.337	25.243	2.151	-47.104	37.737	2.6
1989-09-15	F	4	21.4	-2.649	28.808	3.339	-2.571	12.483	9.044	14.788	-0.326	0.383	-20.579	-0.318	-0.24	43.348	-3.684	-5.578	-45.889	-3.046	-6.538	32.243	19.001	-0.088	-33.958	19.534	-0.917	31.104	-17.232	9.082	-34.549	-16.549	5.89	-1.887	-12.009	42.703	-2.08	-32.502	33.236	11.676	-20.073	26.062	-16.762	-21.05	26.786	-2.593	-40.346	37.28	-2.522
1989-10-29	F	4	18.4	0.011	26.596	8.357	-0.593	8.062	11.347	19.458	-0.415	0.104	-21.351	0.123	-0.399	45.627	-5.192	-5.75	-46.573	-0.698	-6.495	33.937	14.811	1.351	-34.866	18.304	0.739	32.669	-18.103	9.589	-32.451	-16.856	10.206	-0.856	-20.532	45.922	-1.95	-36.795	33.255	14.638	-27.829	28.33	-17.545	-26.854	28.758	-2.869	-47.545	37.722	-2.355
1989-08-15	F	4	19.1	1.148	25.885	6.391	0.205	10.092	9.341	18.922	-0.681	-0.089	-19.428	0.143	-0.431	47.215	0.98	-6.38	-47.138	1.584	-5.885	36.784	21.453	-0.412	-31.58	21.267	1.161	37.519	-16.285	3.799	-33.693	-15.289	5.174	-0.239	-23.144	39.421	-1.103	-37.212	26.168	18.628	-28.871	21.797	-16.667	-29.344	22.272	-0.235	-48.43	28.547	-0.522
1989-10-09	F	4	23.4	0.184	28.522	9.721	0.53	10.219	14.001	18.916	-0.732	-0.16	-18.488	0.413	-0.572	45.547	-3.005	-7.403	-42.907	-1.123	-6.552	33.41	17.387	2.374	-30.356	18.152	2.177	31.863	-21.201	8.36	-31.027	-18.498	9.009	0.176	-22.603	45.408	0.366	-40.725	32.471	15.752	-31.025	28.94	-16.235	-30.145	28.052	-0.096	-49.884	38.956	0.068
1989-12-09	F	4	20.4	2.112	29.584	4.529	2.829	13.196	11.23	22.167	-0.396	-0.182	-15.272	0.063	-0.714	48.299	-1.933	-7.147	-39.759	-0.914	-4.344	36.409	17.943	-0.318	-29.487	20.146	-0.394	36.142	-15.867	10.174	-29.784	-13.334	8.042	0.716	-6.785	47.389	1.397	-26.187	38.682	17.517	-21.667	29.327	-14.206	-21.878	28.918	1.576	-39.598	43.6	1.912
1988-12-02	F	4	18.8	-0.33	31.348	5.654	-0.64	11.328	12.537	16.359	0.617	0.216	-18.542	0.595	-0.481	46.771	-6.534	-6.252	-46.409	-3.052	-6.286	32.006	18.906	2.46	-33.299	19.044	1.289	32.274	-19.477	9.536	-31.824	-16.832	10.255	-1.251	-22.38	47.157	-0.742	-38.15	34.277	14.685	-30.138	25.949	-15.889	-29.447	27.981	-1.117	-51.617	34.983	-1.332
1990-12-07	F	4	17.6	-2.136	26.582	8.066	-1.846	16.464	9.944	13.857	0.518	0.013	-16.334	0.231	-0.241	38.231	0.593	-3.591	-40.737	1.941	-5.32	27.787	18.376	3.974	-27.72	18.583	3.637	26.443	-15.122	6.806	-27.683	-14.792	7.103	-1.286	-18.716	42.786	-1.366	-34.522	29.827	14.588	-25.202	24.81	-18.006	-25.263	23.884	-1.443	-44.028	31.908	-1.449
LEGEND
Group
1	edentulous
2	partially edentulous
3	toothed
4	controls
[truncated: 68 more columns]
